# Supplementary material
Source: publisher figshare collection journal article supplement (https://acs.figshare.com/ndownloader/files/5195440)
Supplement: Supplementary file 1 [file 5195440]

# 1. SUBMISSION DETAILS

_publ_contact_author
;
    	David A. Shultz
	Department of Chemistry, 527 Dabney Hall
	North Carolina State University
	Raleigh, NC  27695-8204


;
_publ_contact_author_email         'David_Shultz@ncsu.edu'
_publ_contact_author_fax           '(919)515-6972'
_publ_contact_author_phone         '(919)515-8920'

_publ_requested_journal            ?
_publ_requested_coeditor_name      ?

_publ_contact_letter
;
     Please consider this CIF for publication in 

;


# 2. PROCESSING SUMMARY (IUCr Office Use Only)

_journal_date_recd_electronic     ?
_journal_date_to_coeditor         ?
_journal_date_from_coeditor       ?
_journal_date_accepted            ?

_journal_date_printers_first      ?
_journal_date_printers_final      ?
_journal_date_proofs_out          ?
_journal_date_proofs_in           ?


_journal_coeditor_name            ?
_journal_coeditor_code            ?
_journal_coeditor_notes
; ?
;

_journal_techeditor_code          ?
_journal_techeditor_notes
; ?
;

_journal_coden_ASTM               ?
_journal_name_full                ?
_journal_year                     ?
_journal_volume                   ?

_journal_issue                    ?
_journal_page_first               ?
_journal_page_last                ?

_journal_suppl_publ_number        ?
_journal_suppl_publ_pages         ?

# 3. TITLE AND AUTHOR LIST

_publ_section_title
; ?
;


# The loop structure below should contain the names  and addresses of all
# authors, in the required order  of publication. Repeat as necessary.

loop_
_publ_author_name
_publ_author_address

'Shultz, David A.'
;
	Department of Chemistry, 527 Dabney Hall
	North Carolina State University
	Raleigh, NC  27695-8204

;
'Kirschbaum, Kristin'
;
	Department of Chemistry
	University of Toledo
	2801 W. Bancroft St.
	Toledo, OH 43606
	USA
;
'Pinkerton, A. Alan'
;
	Department of Chemistry
	University of Toledo
	2801 W. Bancroft St.
	Toledo, OH 43606
	USA
;


# 4. TEXT

_publ_section_abstract
; ?
;

_publ_section_comment
; ?
;


_publ_section_experimental
; The structure is refined based on the reflections that belong to one and 
only one of the four domains, which resulted from cracking of the crystal 
upon cooling. The ratio of the four domains is 0.57:0.20:0.21:0.02.
;

 _publ_section_references
;

Blessing, R.H., (1995). Acta Cryst. A51, 33-58.

Flack, H.D. (1983). Acta Cryst. A39, 876-881.

Flack, H.D. & Schwarzenbach, D. (1988). Acta Cryst. A44, 499-506.

International Tables for X-Ray Crystallography, Vol. IV, The Kynoch Press,
Birmingham, England, 1974

Sheldrick, G.M. (1990). Acta Cryst. A46, 467-473.

Sheldrick, G.M. (1993). SHELXL-93,  Univ. G\"ottingen.

Sheldrick, G.M. (1996). SADABS, Univ. G\"ottingen.

;

 
_publ_section_figure_captions
; ?
;


_publ_section_acknowledgements
;
We thank the College of Arts and Sciences of the University
of Toledo for generous financial support of the X-ray diffraction facility.
;


data_abcd3a 
 
_audit_creation_method            SHELXL-97 
_chemical_name_systematic 
; 
 ? 
; 
_chemical_name_common             ? 
_chemical_melting_point           ? 
_chemical_formula_moiety          ? 
_chemical_formula_sum             'C31 H40 N2 O2' 
_chemical_formula_weight          472.65 
 
loop_ 
 _atom_type_symbol 
 _atom_type_description 
 _atom_type_scat_dispersion_real 
 _atom_type_scat_dispersion_imag 
 _atom_type_scat_source 
 'C'  'C'   0.0033   0.0016 
 'International Tables Vol C Tables 4.2.6.8 and 6.1.1.4' 
 'H'  'H'   0.0000   0.0000 
 'International Tables Vol C Tables 4.2.6.8 and 6.1.1.4' 
 'N'  'N'   0.0061   0.0033 
 'International Tables Vol C Tables 4.2.6.8 and 6.1.1.4' 
 'O'  'O'   0.0106   0.0060 
 'International Tables Vol C Tables 4.2.6.8 and 6.1.1.4' 
 
_symmetry_cell_setting            'triclinic' 
_symmetry_space_group_name_H-M    'P1bar'
 
loop_ 
 _symmetry_equiv_pos_as_xyz 
 'x, y, z' 
 '-x, -y, -z' 
 
_cell_length_a                    6.2971(5) 
_cell_length_b                    11.9668(10) 
_cell_length_c                    17.4475(12) 
_cell_angle_alpha                 100.563(3) 
_cell_angle_beta                  96.732(3) 
_cell_angle_gamma                 94.661(3) 
_cell_volume                      1276.46(17) 
_cell_formula_units_Z             2 
_cell_measurement_temperature     25(5) 
_cell_measurement_reflns_used     981 
_cell_measurement_theta_min       3 
_cell_measurement_theta_max       30 
 
_exptl_crystal_description        'cracked plate' 
_exptl_crystal_colour             'red' 
_exptl_crystal_size_max           0.20
_exptl_crystal_size_mid           0.20
_exptl_crystal_size_min           0.05
_exptl_crystal_density_meas       ? 
_exptl_crystal_density_diffrn     1.230 
_exptl_crystal_density_method     'not measured' 
_exptl_crystal_F_000              512 
_exptl_absorpt_coefficient_mu     0.076 
_exptl_absorpt_correction_type    ? 
_exptl_absorpt_correction_T_min   ? 
_exptl_absorpt_correction_T_max   ? 
_exptl_absorpt_process_details    ? 
 
_exptl_special_details 
; 
 ? 
; 
 
_diffrn_ambient_temperature       25(5) 
_diffrn_radiation_wavelength      0.71073 
_diffrn_radiation_type            MoK\a 
_diffrn_radiation_source          'sealed tube' 
_diffrn_radiation_monochromator   graphite 
_diffrn_measurement_device_type   'Platform'
_diffrn_measurement_method        '\w scans'
_diffrn_detector_area_resol_mean  ? 
_diffrn_standards_number          ? 
_diffrn_standards_interval_count  ? 
_diffrn_standards_interval_time   ? 
_diffrn_standards_decay_%         ? 
_diffrn_reflns_number             1314 
_diffrn_reflns_av_R_equivalents   0.1085 
_diffrn_reflns_av_sigmaI/netI     0.0384 
_diffrn_reflns_limit_h_min        -5 
_diffrn_reflns_limit_h_max        6 
_diffrn_reflns_limit_k_min        -5 
_diffrn_reflns_limit_k_max        12 
_diffrn_reflns_limit_l_min        -18 
_diffrn_reflns_limit_l_max        18 
_diffrn_reflns_theta_min          3.23 
_diffrn_reflns_theta_max          23.99 
_reflns_number_total              1254 
_reflns_number_gt                 1129 
_reflns_threshold_expression      >2sigma(I) 
 
_computing_data_collection        ? 
_computing_cell_refinement        ? 
_computing_data_reduction         ? 
_computing_structure_solution     'SHELXS-97 (Sheldrick, 1990)' 
_computing_structure_refinement   'SHELXL-97 (Sheldrick, 1997)' 
_computing_molecular_graphics     ? 
_computing_publication_material   ? 
 
_refine_special_details 
; 
 Refinement of F^2^ against ALL reflections.  The weighted R-factor wR and 
 goodness of fit S are based on F^2^, conventional R-factors R are based 
 on F, with F set to zero for negative F^2^. The threshold expression of 
 F^2^ > 2sigma(F^2^) is used only for calculating R-factors(gt) etc. and is 
 not relevant to the choice of reflections for refinement.  R-factors based 
 on F^2^ are statistically about twice as large as those based on F, and R- 
 factors based on ALL data will be even larger. 
; 
 
_refine_ls_structure_factor_coef  Fsqd  
_refine_ls_matrix_type            full 
_refine_ls_weighting_scheme       calc  
_refine_ls_weighting_details 
 'calc w=1/[\s^2^(Fo^2^)+(0.0970P)^2^+4.1112P] where P=(Fo^2^+2Fc^2^)/3' 
_atom_sites_solution_primary      direct 
_atom_sites_solution_secondary    difmap 
_atom_sites_solution_hydrogens    geom 
_refine_ls_hydrogen_treatment     'included with U(H)=1.5(1.2)*U(bonded C)' 
_refine_ls_extinction_method      none 
_refine_ls_extinction_coef        ? 
_refine_ls_number_reflns          1254 
_refine_ls_number_parameters      161 
_refine_ls_number_restraints      0 
_refine_ls_R_factor_all           0.1031 
_refine_ls_R_factor_gt            0.0948 
_refine_ls_wR_factor_ref          0.2323 
_refine_ls_wR_factor_gt           0.2259 
_refine_ls_goodness_of_fit_ref    1.249 
_refine_ls_restrained_S_all       1.249 
_refine_ls_shift/su_max           0.000 
_refine_ls_shift/su_mean          0.000 
 
loop_ 
 _atom_site_label 
 _atom_site_type_symbol 
 _atom_site_fract_x 
 _atom_site_fract_y 
 _atom_site_fract_z 
 _atom_site_U_iso_or_equiv 
 _atom_site_adp_type 
 _atom_site_occupancy 
 _atom_site_symmetry_multiplicity 
 _atom_site_calc_flag 
 _atom_site_refinement_flags 
 _atom_site_disorder_assembly 
 _atom_site_disorder_group 
O1 O -2.5036(10) -1.1168(6) -0.7226(3) 0.0145(19) Uani 1 1 d . . . 
O2 O -1.3700(10) -1.5740(6) -0.5370(3) 0.0115(18) Uani 1 1 d . . . 
N1 N -2.3054(12) -1.1248(7) -0.7331(3) 0.012(2) Uani 1 1 d . . . 
N2 N -1.5630(13) -1.6155(7) -0.5305(3) 0.016(2) Uani 1 1 d . . . 
C1 C -2.1606(15) -1.0128(9) -0.7148(4) 0.0143(18) Uiso 1 1 d . . . 
C2 C -2.0018(16) -1.0100(9) -0.7753(4) 0.0196(19) Uiso 1 1 d . . . 
H2A H -2.0804 -1.0184 -0.8269 0.029 Uiso 1 1 calc R . . 
H2B H -1.9132 -1.0715 -0.7740 0.029 Uiso 1 1 calc R . . 
H2C H -1.9126 -0.9384 -0.7625 0.029 Uiso 1 1 calc R . . 
C3 C -2.3023(15) -0.9167(9) -0.7177(4) 0.0154(18) Uiso 1 1 d . . . 
H3A H -2.3779 -0.9251 -0.7699 0.023 Uiso 1 1 calc R . . 
H3B H -2.2147 -0.8446 -0.7041 0.023 Uiso 1 1 calc R . . 
H3C H -2.4039 -0.9194 -0.6810 0.023 Uiso 1 1 calc R . . 
C4 C -2.0379(15) -0.9994(9) -0.6304(4) 0.0152(18) Uiso 1 1 d . . . 
H4A H -2.1395 -1.0014 -0.5936 0.023 Uiso 1 1 calc R . . 
H4B H -1.9490 -0.9277 -0.6170 0.023 Uiso 1 1 calc R . . 
H4C H -1.9496 -1.0608 -0.6285 0.023 Uiso 1 1 calc R . . 
C5 C -2.2405(14) -1.2331(8) -0.7571(4) 0.0120(17) Uiso 1 1 d . . . 
C6 C -2.0309(14) -1.2622(8) -0.7441(4) 0.0124(17) Uiso 1 1 d . . . 
H6A H -1.9195 -1.2054 -0.7220 0.015 Uiso 1 1 calc R . . 
C7 C -1.9874(15) -1.3734(8) -0.7637(4) 0.0117(17) Uiso 1 1 d . . . 
H7A H -1.8471 -1.3911 -0.7533 0.014 Uiso 1 1 calc R . . 
C8 C -2.1514(14) -1.4622(8) -0.7993(3) 0.0081(15) Uiso 1 1 d . . . 
C9 C -2.3603(14) -1.4322(8) -0.8128(4) 0.0088(16) Uiso 1 1 d . . . 
H9A H -2.4709 -1.4889 -0.8358 0.011 Uiso 1 1 calc R . . 
C10 C -2.4070(15) -1.3211(8) -0.7929(4) 0.0118(17) Uiso 1 1 d . . . 
H10A H -2.5475 -1.3035 -0.8029 0.014 Uiso 1 1 calc R . . 
C11 C -2.1024(14) -1.5836(8) -0.8123(4) 0.0117(18) Uiso 1 1 d . . . 
C12 C -1.9755(14) -1.6146(8) -0.7419(3) 0.0072(16) Uiso 1 1 d . . . 
C13 C -2.0510(14) -1.5862(8) -0.6682(4) 0.0119(17) Uiso 1 1 d . . . 
H13A H -2.1865 -1.5613 -0.6655 0.014 Uiso 1 1 calc R . . 
C14 C -1.9209(14) -1.5959(8) -0.5994(4) 0.0103(16) Uiso 1 1 d . . . 
H14A H -1.9729 -1.5800 -0.5512 0.012 Uiso 1 1 calc R . . 
C15 C -1.7181(15) -1.6284(8) -0.6022(4) 0.0112(18) Uiso 1 1 d . . . 
C16 C -1.6460(15) -1.6619(8) -0.6751(4) 0.0142(18) Uiso 1 1 d . . . 
H16A H -1.5113 -1.6879 -0.6777 0.017 Uiso 1 1 calc R . . 
C17 C -1.7791(14) -1.6558(8) -0.7441(4) 0.0093(16) Uiso 1 1 d . . . 
H17A H -1.7331 -1.6803 -0.7925 0.011 Uiso 1 1 calc R . . 
C18 C -1.5833(14) -1.6976(8) -0.4750(4) 0.0096(17) Uiso 1 1 d . . . 
C19 C -1.8142(14) -1.7169(8) -0.4584(4) 0.0127(17) Uiso 1 1 d . . . 
H19A H -1.8585 -1.6458 -0.4335 0.019 Uiso 1 1 calc R . . 
H19B H -1.8228 -1.7711 -0.4242 0.019 Uiso 1 1 calc R . . 
H19C H -1.9067 -1.7460 -0.5069 0.019 Uiso 1 1 calc R . . 
C20 C -1.4342(14) -1.6479(8) -0.3991(4) 0.0125(17) Uiso 1 1 d . . . 
H20A H -1.4815 -1.5775 -0.3745 0.019 Uiso 1 1 calc R . . 
H20B H -1.2904 -1.6337 -0.4109 0.019 Uiso 1 1 calc R . . 
H20C H -1.4365 -1.7011 -0.3642 0.019 Uiso 1 1 calc R . . 
C21 C -1.5090(14) -1.8105(8) -0.5150(4) 0.0142(18) Uiso 1 1 d . . . 
H21A H -1.3635 -1.7972 -0.5252 0.021 Uiso 1 1 calc R . . 
H21B H -1.6006 -1.8399 -0.5637 0.021 Uiso 1 1 calc R . . 
H21C H -1.5165 -1.8650 -0.4810 0.021 Uiso 1 1 calc R . . 
C22 C -2.1609(14) -1.6589(8) -0.8825(4) 0.0100(17) Uiso 1 1 d . . . 
C23 C -2.1461(14) -1.7860(8) -0.8930(4) 0.0111(17) Uiso 1 1 d . . . 
H23A H -2.0945 -1.8059 -0.8425 0.013 Uiso 1 1 calc R . . 
C24 C -1.9878(14) -1.8207(8) -0.9538(4) 0.0118(17) Uiso 1 1 d . . . 
H24A H -1.8446 -1.7830 -0.9337 0.014 Uiso 1 1 calc R . . 
H24B H -1.9809 -1.9026 -0.9629 0.014 Uiso 1 1 calc R . . 
C25 C -2.0705(14) -1.7843(8) -1.0315(4) 0.0098(16) Uiso 1 1 d . . . 
H25A H -1.9712 -1.8040 -1.0699 0.012 Uiso 1 1 calc R . . 
C26 C -2.0862(15) -1.6568(8) -1.0177(4) 0.0118(16) Uiso 1 1 d . . . 
H26A H -2.1337 -1.6350 -1.0673 0.014 Uiso 1 1 calc R . . 
H26B H -1.9452 -1.6165 -0.9974 0.014 Uiso 1 1 calc R . . 
C27 C -2.2461(14) -1.6215(8) -0.9584(3) 0.0102(16) Uiso 1 1 d . . . 
H27A H -2.2549 -1.5388 -0.9494 0.012 Uiso 1 1 calc R . . 
C28 C -2.4673(14) -1.6877(8) -0.9907(4) 0.0131(17) Uiso 1 1 d . . . 
H28A H -2.5679 -1.6674 -0.9537 0.016 Uiso 1 1 calc R . . 
H28B H -2.5205 -1.6666 -1.0399 0.016 Uiso 1 1 calc R . . 
C29 C -2.4530(15) -1.8153(8) -1.0039(4) 0.0134(17) Uiso 1 1 d . . . 
H29A H -2.5958 -1.8560 -1.0241 0.016 Uiso 1 1 calc R . . 
C30 C -2.2947(14) -1.8497(8) -1.0635(4) 0.0127(17) Uiso 1 1 d . . . 
H30A H -2.2851 -1.9314 -1.0711 0.015 Uiso 1 1 calc R . . 
H30B H -2.3461 -1.8314 -1.1138 0.015 Uiso 1 1 calc R . . 
C31 C -2.3692(14) -1.8487(8) -0.9250(3) 0.0095(16) Uiso 1 1 d . . . 
H31A H -2.4678 -1.8290 -0.8871 0.011 Uiso 1 1 calc R . . 
H31B H -2.3617 -1.9306 -0.9331 0.011 Uiso 1 1 calc R . . 
 
loop_ 
 _atom_site_aniso_label 
 _atom_site_aniso_U_11 
 _atom_site_aniso_U_22 
 _atom_site_aniso_U_33 
 _atom_site_aniso_U_23 
 _atom_site_aniso_U_13 
 _atom_site_aniso_U_12 
O1 0.012(4) 0.011(5) 0.018(3) 0.001(2) -0.001(2) -0.005(3) 
O2 0.009(4) 0.011(5) 0.014(3) 0.006(2) 0.000(2) -0.006(3) 
N1 0.012(5) 0.009(6) 0.013(3) 0.001(3) -0.002(3) -0.003(4) 
N2 0.015(5) 0.022(7) 0.006(3) 0.001(3) -0.001(3) -0.010(4) 
 
_geom_special_details 
; 
 All esds (except the esd in the dihedral angle between two l.s. planes) 
 are estimated using the full covariance matrix.  The cell esds are taken 
 into account individually in the estimation of esds in distances, angles 
 and torsion angles; correlations between esds in cell parameters are only 
 used when they are defined by crystal symmetry.  An approximate (isotropic) 
 treatment of cell esds is used for estimating esds involving l.s. planes. 
; 
 
loop_ 
 _geom_bond_atom_site_label_1 
 _geom_bond_atom_site_label_2 
 _geom_bond_distance 
 _geom_bond_site_symmetry_2 
 _geom_bond_publ_flag 
O1 N1 1.292(9) . ? 
O2 N2 1.300(9) . ? 
N1 C5 1.396(12) . ? 
N1 C1 1.518(12) . ? 
N2 C15 1.470(10) . ? 
N2 C18 1.509(13) . ? 
C1 C3 1.517(15) . ? 
C1 C2 1.539(12) . ? 
C1 C4 1.554(10) . ? 
C2 H2A 0.9600 . ? 
C2 H2B 0.9600 . ? 
C2 H2C 0.9600 . ? 
C3 H3A 0.9600 . ? 
C3 H3B 0.9600 . ? 
C3 H3C 0.9600 . ? 
C4 H4A 0.9600 . ? 
C4 H4B 0.9600 . ? 
C4 H4C 0.9600 . ? 
C5 C6 1.396(14) . ? 
C5 C10 1.423(12) . ? 
C6 C7 1.371(13) . ? 
C6 H6A 0.9300 . ? 
C7 C8 1.418(12) . ? 
C7 H7A 0.9300 . ? 
C8 C9 1.396(13) . ? 
C8 C11 1.492(13) . ? 
C9 C10 1.376(13) . ? 
C9 H9A 0.9300 . ? 
C10 H10A 0.9300 . ? 
C11 C22 1.372(9) . ? 
C11 C12 1.507(12) . ? 
C12 C17 1.370(13) . ? 
C12 C13 1.415(10) . ? 
C13 C14 1.401(12) . ? 
C13 H13A 0.9300 . ? 
C14 C15 1.369(14) . ? 
C14 H14A 0.9300 . ? 
C15 C16 1.401(10) . ? 
C16 C17 1.400(12) . ? 
C16 H16A 0.9300 . ? 
C17 H17A 0.9300 . ? 
C18 C20 1.522(9) . ? 
C18 C19 1.523(11) . ? 
C18 C21 1.538(13) . ? 
C19 H19A 0.9600 . ? 
C19 H19B 0.9600 . ? 
C19 H19C 0.9600 . ? 
C20 H20A 0.9600 . ? 
C20 H20B 0.9600 . ? 
C20 H20C 0.9600 . ? 
C21 H21A 0.9600 . ? 
C21 H21B 0.9600 . ? 
C21 H21C 0.9600 . ? 
C22 C23 1.510(13) . ? 
C22 C27 1.528(12) . ? 
C23 C31 1.530(12) . ? 
C23 C24 1.563(11) . ? 
C23 H23A 0.9800 . ? 
C24 C25 1.544(12) . ? 
C24 H24A 0.9700 . ? 
C24 H24B 0.9700 . ? 
C25 C26 1.513(13) . ? 
C25 C30 1.547(12) . ? 
C25 H25A 0.9800 . ? 
C26 C27 1.554(11) . ? 
C26 H26A 0.9700 . ? 
C26 H26B 0.9700 . ? 
C27 C28 1.535(12) . ? 
C27 H27A 0.9800 . ? 
C28 C29 1.513(14) . ? 
C28 H28A 0.9700 . ? 
C28 H28B 0.9700 . ? 
C29 C30 1.548(12) . ? 
C29 C31 1.549(12) . ? 
C29 H29A 0.9800 . ? 
C30 H30A 0.9700 . ? 
C30 H30B 0.9700 . ? 
C31 H31A 0.9700 . ? 
C31 H31B 0.9700 . ? 
 
loop_ 
 _geom_angle_atom_site_label_1 
 _geom_angle_atom_site_label_2 
 _geom_angle_atom_site_label_3 
 _geom_angle 
 _geom_angle_site_symmetry_1 
 _geom_angle_site_symmetry_3 
 _geom_angle_publ_flag 
O1 N1 C5 118.7(7) . . ? 
O1 N1 C1 115.5(7) . . ? 
C5 N1 C1 125.8(7) . . ? 
O2 N2 C15 114.4(6) . . ? 
O2 N2 C18 117.3(7) . . ? 
C15 N2 C18 120.3(6) . . ? 
C3 C1 N1 107.9(7) . . ? 
C3 C1 C2 109.3(8) . . ? 
N1 C1 C2 111.1(6) . . ? 
C3 C1 C4 109.6(6) . . ? 
N1 C1 C4 108.2(7) . . ? 
C2 C1 C4 110.7(7) . . ? 
C1 C2 H2A 109.5 . . ? 
C1 C2 H2B 109.5 . . ? 
H2A C2 H2B 109.5 . . ? 
C1 C2 H2C 109.5 . . ? 
H2A C2 H2C 109.5 . . ? 
H2B C2 H2C 109.5 . . ? 
C1 C3 H3A 109.5 . . ? 
C1 C3 H3B 109.5 . . ? 
H3A C3 H3B 109.5 . . ? 
C1 C3 H3C 109.5 . . ? 
H3A C3 H3C 109.5 . . ? 
H3B C3 H3C 109.5 . . ? 
C1 C4 H4A 109.5 . . ? 
C1 C4 H4B 109.5 . . ? 
H4A C4 H4B 109.5 . . ? 
C1 C4 H4C 109.5 . . ? 
H4A C4 H4C 109.5 . . ? 
H4B C4 H4C 109.5 . . ? 
C6 C5 N1 125.3(7) . . ? 
C6 C5 C10 118.5(9) . . ? 
N1 C5 C10 116.1(8) . . ? 
C7 C6 C5 120.7(8) . . ? 
C7 C6 H6A 119.7 . . ? 
C5 C6 H6A 119.7 . . ? 
C6 C7 C8 121.5(9) . . ? 
C6 C7 H7A 119.2 . . ? 
C8 C7 H7A 119.2 . . ? 
C9 C8 C7 117.4(8) . . ? 
C9 C8 C11 122.3(8) . . ? 
C7 C8 C11 119.9(8) . . ? 
C10 C9 C8 121.8(8) . . ? 
C10 C9 H9A 119.1 . . ? 
C8 C9 H9A 119.1 . . ? 
C9 C10 C5 120.0(9) . . ? 
C9 C10 H10A 120.0 . . ? 
C5 C10 H10A 120.0 . . ? 
C22 C11 C8 123.3(8) . . ? 
C22 C11 C12 123.1(9) . . ? 
C8 C11 C12 113.6(6) . . ? 
C17 C12 C13 118.6(7) . . ? 
C17 C12 C11 123.1(6) . . ? 
C13 C12 C11 117.8(8) . . ? 
C14 C13 C12 119.8(9) . . ? 
C14 C13 H13A 120.1 . . ? 
C12 C13 H13A 120.1 . . ? 
C15 C14 C13 120.7(7) . . ? 
C15 C14 H14A 119.7 . . ? 
C13 C14 H14A 119.7 . . ? 
C14 C15 C16 119.8(7) . . ? 
C14 C15 N2 121.5(6) . . ? 
C16 C15 N2 118.3(8) . . ? 
C17 C16 C15 119.2(9) . . ? 
C17 C16 H16A 120.4 . . ? 
C15 C16 H16A 120.4 . . ? 
C12 C17 C16 121.6(6) . . ? 
C12 C17 H17A 119.2 . . ? 
C16 C17 H17A 119.2 . . ? 
N2 C18 C20 107.9(8) . . ? 
N2 C18 C19 111.4(8) . . ? 
C20 C18 C19 110.5(6) . . ? 
N2 C18 C21 106.7(6) . . ? 
C20 C18 C21 109.9(8) . . ? 
C19 C18 C21 110.3(7) . . ? 
C18 C19 H19A 109.5 . . ? 
C18 C19 H19B 109.5 . . ? 
H19A C19 H19B 109.5 . . ? 
C18 C19 H19C 109.5 . . ? 
H19A C19 H19C 109.5 . . ? 
H19B C19 H19C 109.5 . . ? 
C18 C20 H20A 109.5 . . ? 
C18 C20 H20B 109.5 . . ? 
H20A C20 H20B 109.5 . . ? 
C18 C20 H20C 109.5 . . ? 
H20A C20 H20C 109.5 . . ? 
H20B C20 H20C 109.5 . . ? 
C18 C21 H21A 109.5 . . ? 
C18 C21 H21B 109.5 . . ? 
H21A C21 H21B 109.5 . . ? 
C18 C21 H21C 109.5 . . ? 
H21A C21 H21C 109.5 . . ? 
H21B C21 H21C 109.5 . . ? 
C11 C22 C23 123.9(8) . . ? 
C11 C22 C27 122.9(9) . . ? 
C23 C22 C27 113.2(6) . . ? 
C22 C23 C31 108.7(8) . . ? 
C22 C23 C24 109.0(7) . . ? 
C31 C23 C24 109.1(5) . . ? 
C22 C23 H23A 110.0 . . ? 
C31 C23 H23A 110.0 . . ? 
C24 C23 H23A 110.0 . . ? 
C25 C24 C23 108.4(7) . . ? 
C25 C24 H24A 110.0 . . ? 
C23 C24 H24A 110.0 . . ? 
C25 C24 H24B 110.0 . . ? 
C23 C24 H24B 110.0 . . ? 
H24A C24 H24B 108.4 . . ? 
C26 C25 C24 110.4(5) . . ? 
C26 C25 C30 109.9(8) . . ? 
C24 C25 C30 108.5(7) . . ? 
C26 C25 H25A 109.3 . . ? 
C24 C25 H25A 109.3 . . ? 
C30 C25 H25A 109.3 . . ? 
C25 C26 C27 111.3(7) . . ? 
C25 C26 H26A 109.4 . . ? 
C27 C26 H26A 109.4 . . ? 
C25 C26 H26B 109.4 . . ? 
C27 C26 H26B 109.4 . . ? 
H26A C26 H26B 108.0 . . ? 
C22 C27 C28 108.8(7) . . ? 
C22 C27 C26 106.1(7) . . ? 
C28 C27 C26 108.7(5) . . ? 
C22 C27 H27A 111.0 . . ? 
C28 C27 H27A 111.0 . . ? 
C26 C27 H27A 111.0 . . ? 
C29 C28 C27 110.8(8) . . ? 
C29 C28 H28A 109.5 . . ? 
C27 C28 H28A 109.5 . . ? 
C29 C28 H28B 109.5 . . ? 
C27 C28 H28B 109.5 . . ? 
H28A C28 H28B 108.1 . . ? 
C28 C29 C30 110.4(7) . . ? 
C28 C29 C31 109.4(6) . . ? 
C30 C29 C31 108.4(7) . . ? 
C28 C29 H29A 109.6 . . ? 
C30 C29 H29A 109.6 . . ? 
C31 C29 H29A 109.6 . . ? 
C25 C30 C29 109.2(5) . . ? 
C25 C30 H30A 109.8 . . ? 
C29 C30 H30A 109.8 . . ? 
C25 C30 H30B 109.8 . . ? 
C29 C30 H30B 109.8 . . ? 
H30A C30 H30B 108.3 . . ? 
C23 C31 C29 110.1(7) . . ? 
C23 C31 H31A 109.6 . . ? 
C29 C31 H31A 109.6 . . ? 
C23 C31 H31B 109.6 . . ? 
C29 C31 H31B 109.6 . . ? 
H31A C31 H31B 108.2 . . ? 
 
loop_ 
 _geom_torsion_atom_site_label_1 
 _geom_torsion_atom_site_label_2 
 _geom_torsion_atom_site_label_3 
 _geom_torsion_atom_site_label_4 
 _geom_torsion 
 _geom_torsion_site_symmetry_1 
 _geom_torsion_site_symmetry_2 
 _geom_torsion_site_symmetry_3 
 _geom_torsion_site_symmetry_4 
 _geom_torsion_publ_flag 
O2 N2 C15 C14 -135.6(9) . . . . ? 
O2 N2 C15 C16 36.8(11) . . . . ? 
O1 N1 C5 C6 -155.4(8) . . . . ? 
O1 N1 C5 C10 20.2(9) . . . . ? 
C18 N2 C15 C14 76.2(11) . . . . ? 
C1 N1 C5 C6 22.3(12) . . . . ? 

_diffrn_measured_fraction_theta_max    0.314 
_diffrn_reflns_theta_full              23.99 
_diffrn_measured_fraction_theta_full   0.314 
_refine_diff_density_max    0.236 
_refine_diff_density_min   -0.211 
_refine_diff_density_rms    0.051 
